# Supplementary material
Source: Springer Nature journal article supplement (https://www.springermedizin.de/resource/supplementary/12913_2014_3471_MOESM1_ESM.pdf/9532942)

# Kernel density estimate

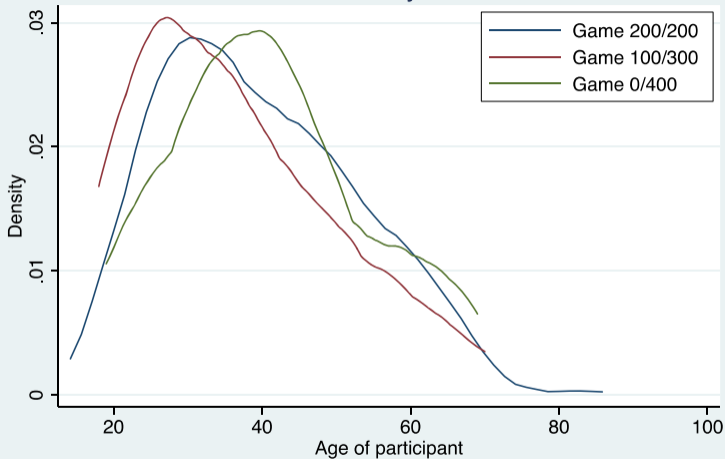

kernel = epanechnikov, bandwidth = 3.8145

Supplement: MOESM1 [file 9532942]
